# Supplementary material for: Acid stress response in Escherichia coli: mechanism of regulation of gadA transcription by RcsB and GadE
Source: PubMed Central journal article supplement — Nucleic Acids Res. 2010 Feb 26;38(11):3546–54. doi: 10.1093/nar/gkq097 (PMC2887963; doi:10.1093/nar/gkq097), 2010-02-26
Supplement: gkq097_1.pdf [file gkq097_1.pdf]

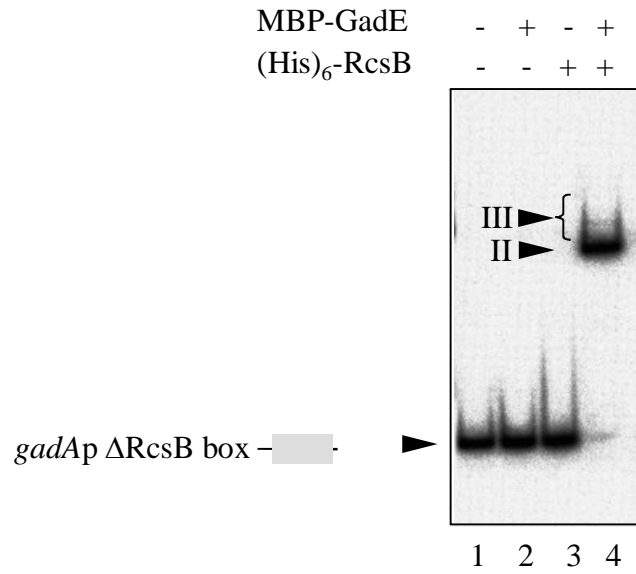

**Figure S1** : EMSA of *gadA* promoter region template containing only the GAD box (*gadAp* ΔRcsB box region from -101 to -22) in the presence of (His)<sub>6</sub>-RcsB (5 μM) and/or MBP-GadE (4 μM).
